# Supplementary material for: Artificial intelligence performance in testing microfluidics for point-of-care
Source: Royal Society of Chemistry journal article supplement (doi:10.1039/d4lc00671b), 2024-01-01
Supplement: d4lc00671b1.pdf [file d4lc00671b1.pdf]

### Supplementary Information

Mert Tunca Doganay<sup>1</sup>, Purbali Chakraborty<sup>1</sup>, Sri Moukthika<sup>1</sup>, Soujanya Jammalamadaka<sup>1</sup>,

Dheerendranath Battalapalli<sup>1</sup>, Anant Madabhushi<sup>2,3</sup>, Mohamed S. Draz<sup>1,4,5\*</sup>

1. Department of Medicine, Case Western Reserve University School of Medicine, Cleveland, OH, 44106, USA.
2. Department of Biomedical Engineering, Emory University, Atlanta, GA, USA.
3. Atlanta Veterans Administration Medical Center, Atlanta, GA, USA.
4. Department of Biomedical Engineering, Case Western Reserve University, Cleveland, OH, USA.
5. Department of Biomedical Engineering, Cleveland Clinic, Cleveland, OH, 44106, USA.

Corresponding author: Mohamed S. Draz. Email: [mohamed.draz@case.edu](mailto:mohamed.draz@case.edu)

**a. Supplementary Figures.**

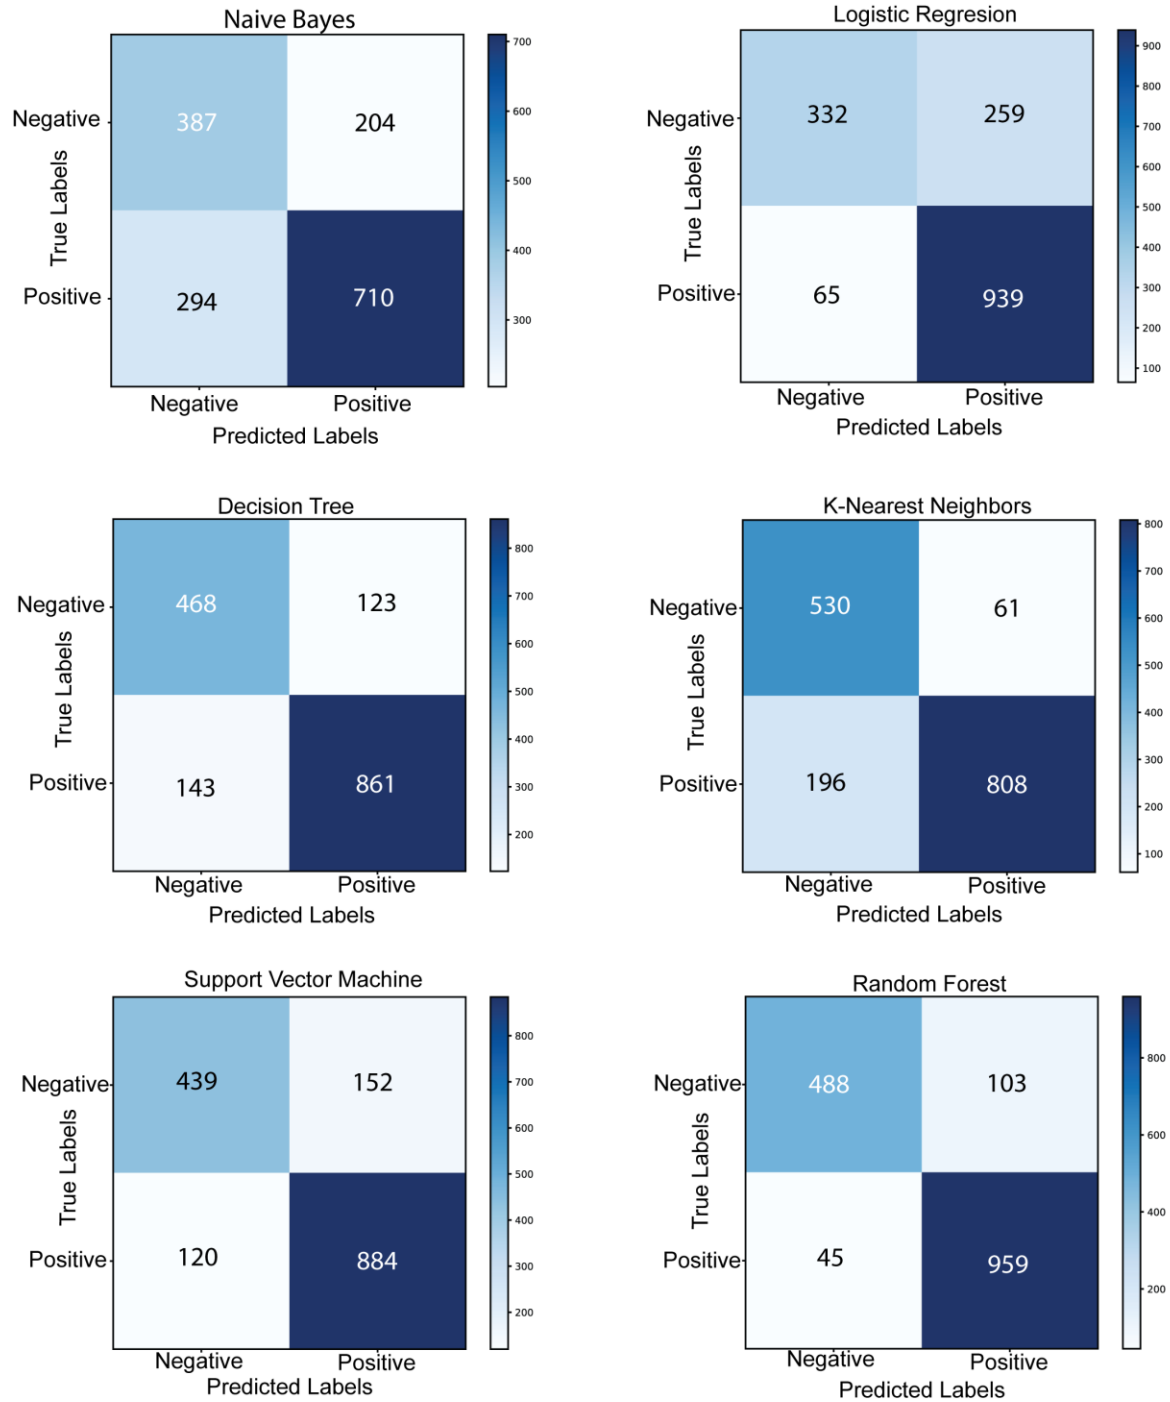

**Supplementary Figure 1.** Confusion matrix analysis of the tested machine learning algorithms.

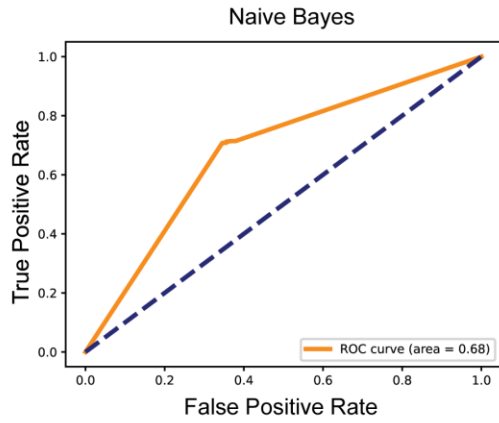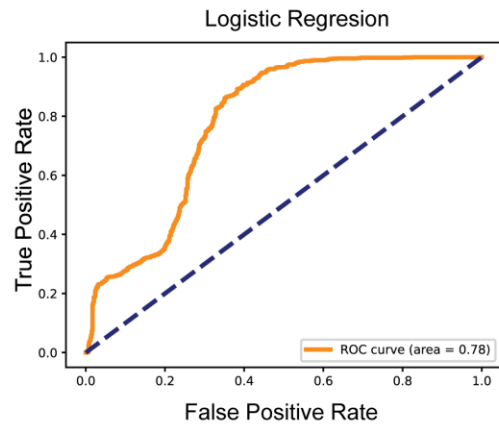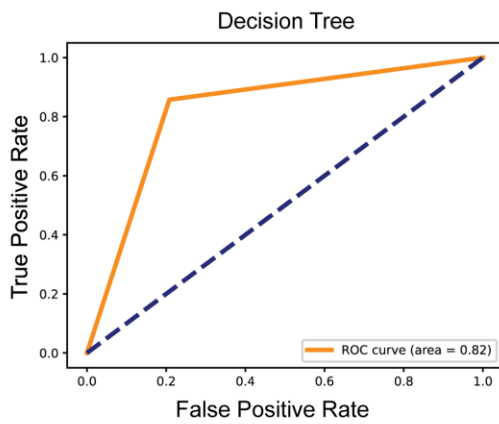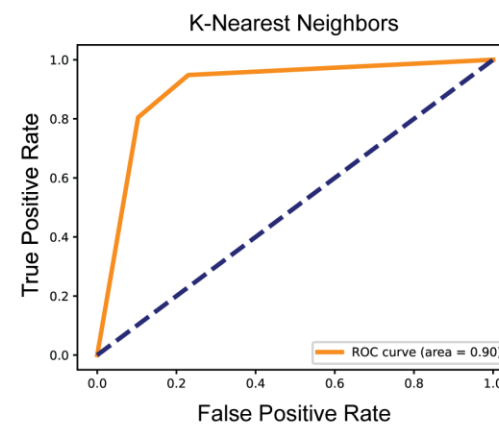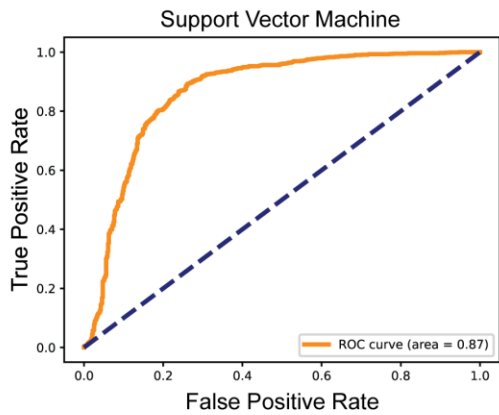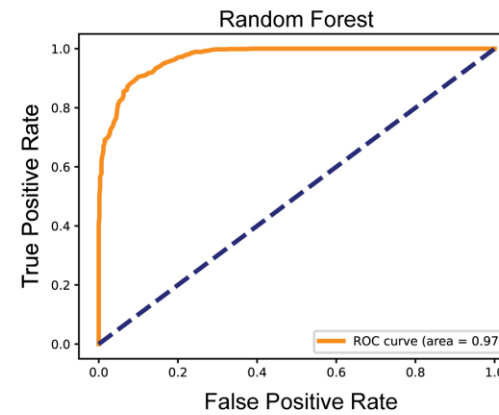

**Supplementary Figure 2.** ROC analysis of the tested machine learning algorithms.

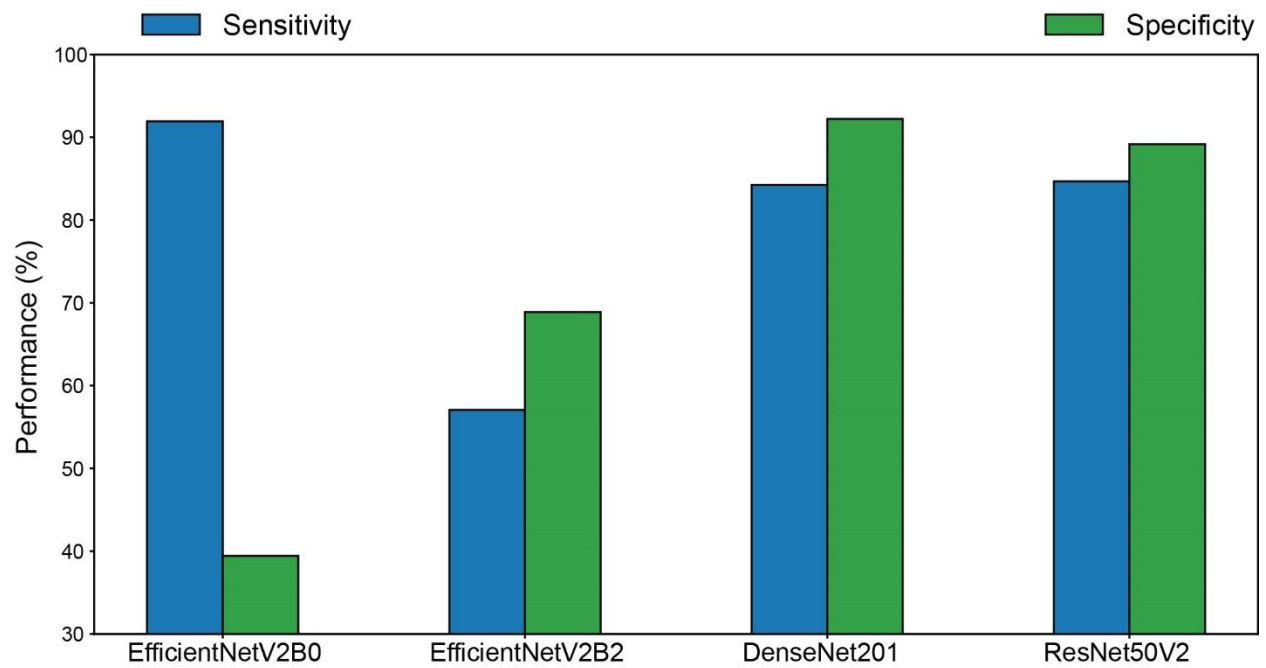

**Supplementary Figure 3.** Performance of deep learning models of EfficientNetV2B0, EfficientNetV2B2, DenseNet201, and ResNet50V2 in microfluidic testing.

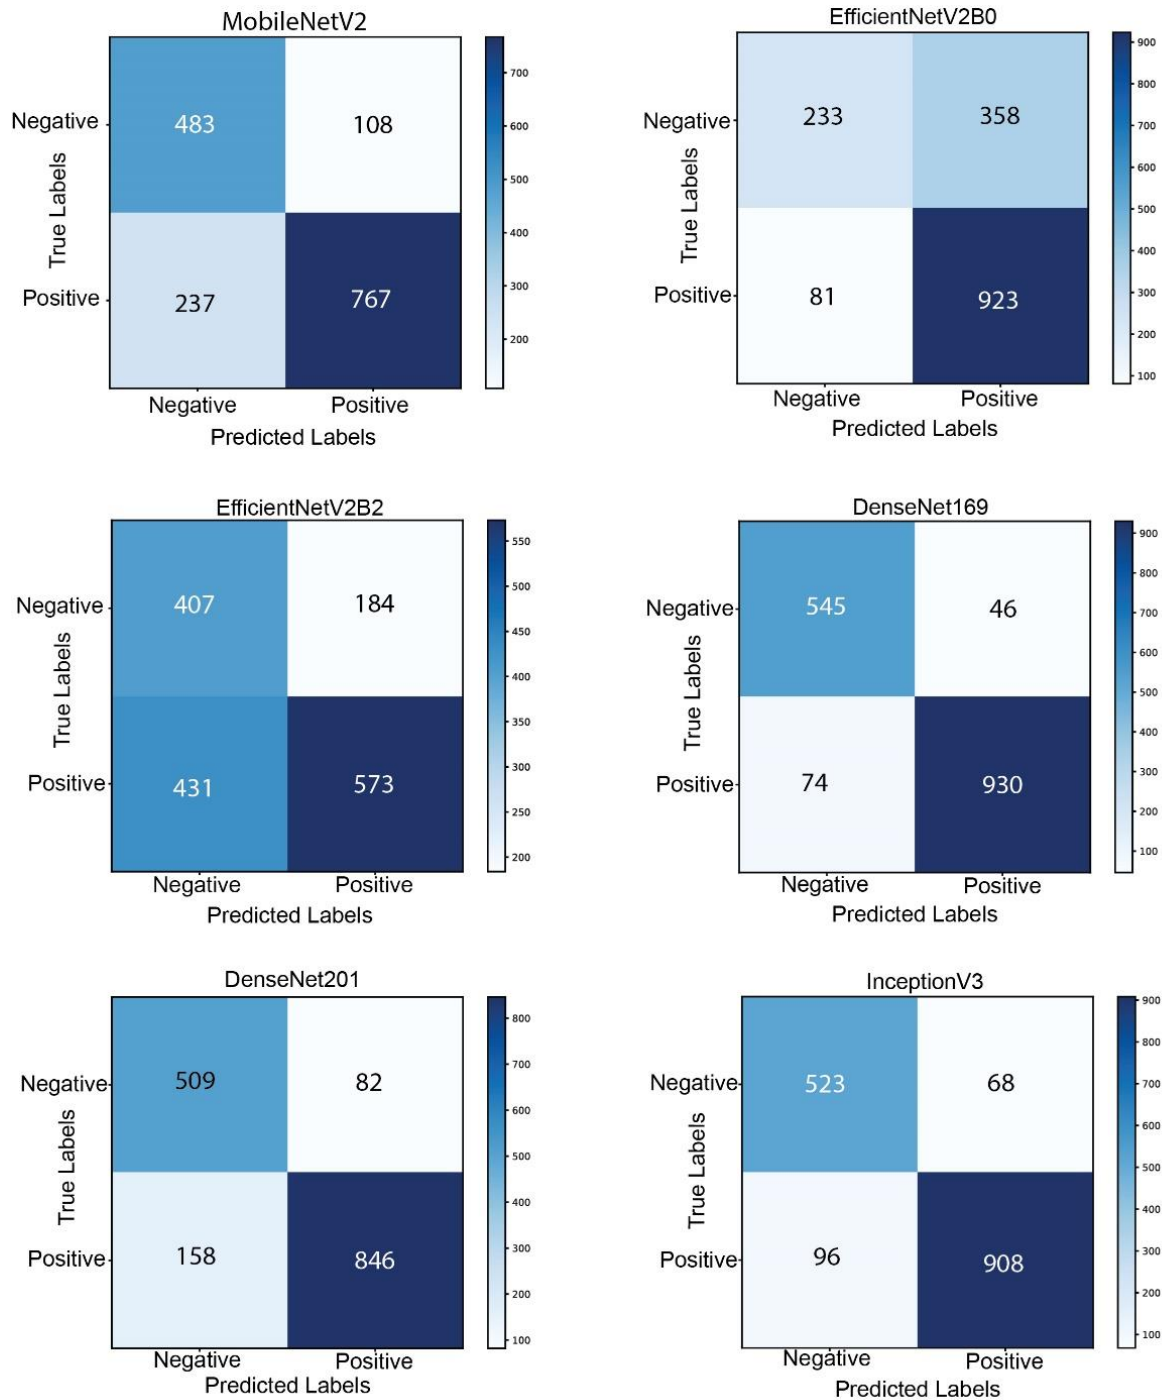

**Supplementary Figure 4.** Confusion matrix analysis of deep learning algorithms of MobileNetV2, EfficientNetV2B0, EfficientNetV2B2, DenseNet169, DenseNet201, and InceptionV3.



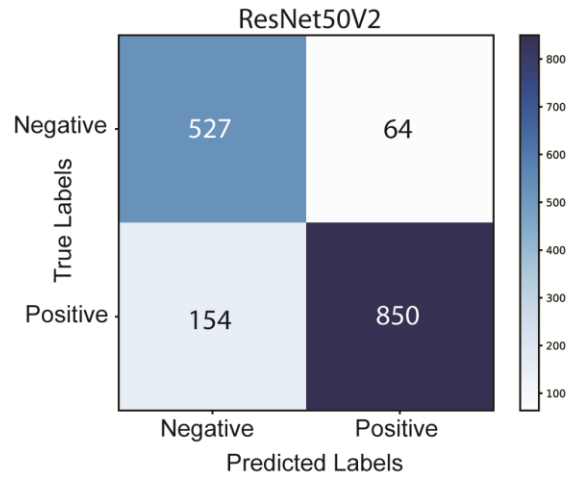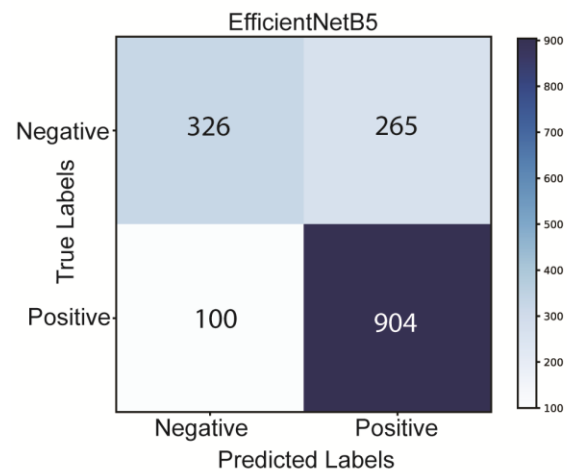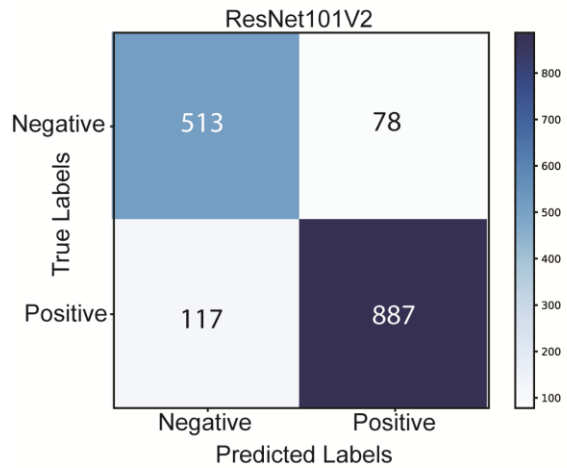

**Supplementary Figure 5.** Confusion matrix analysis of deep learning algorithms of ResNet50V2, EfficientNetB5, and Resnet101V2.

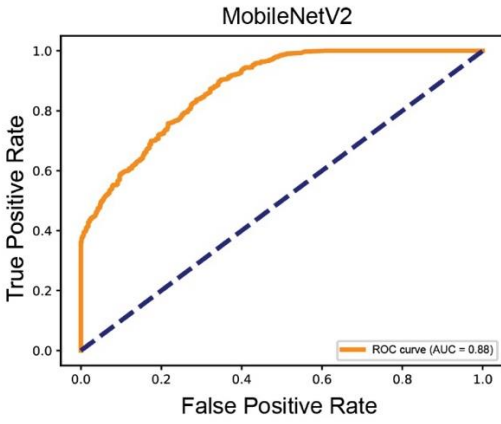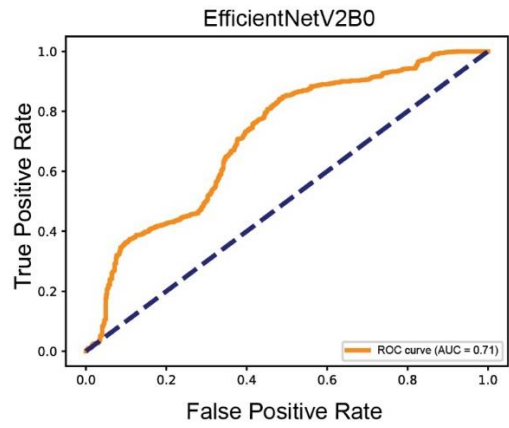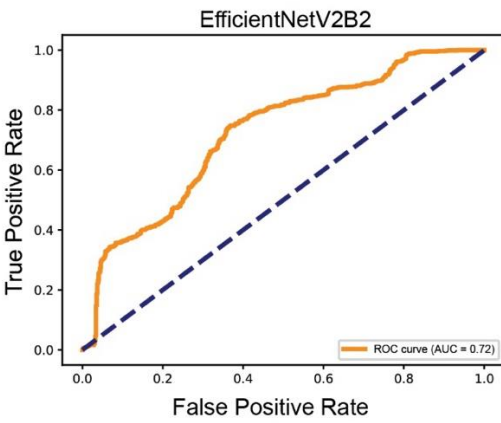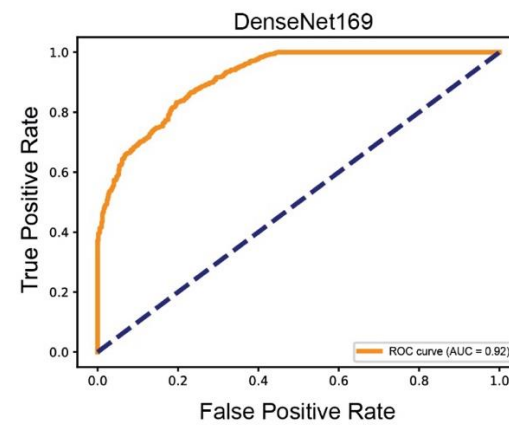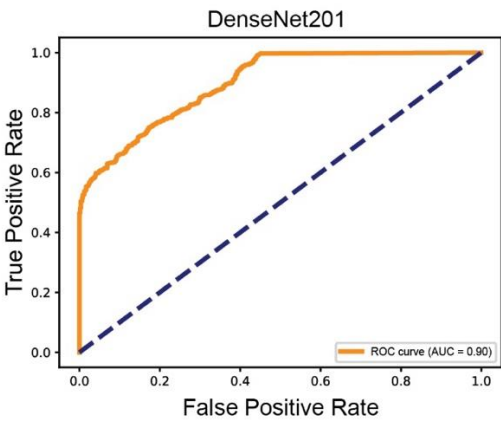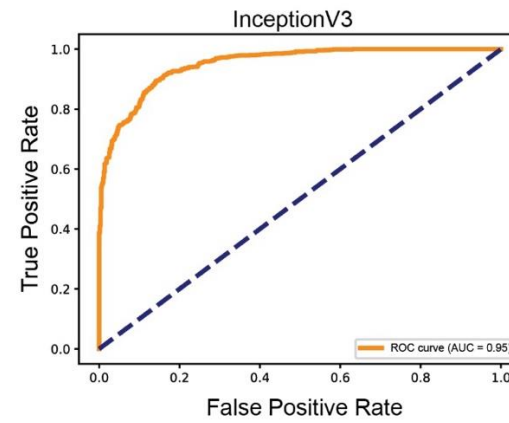

**Supplementary Figure 6.** ROC analysis of deep learning algorithms (MobileNetV2, EfficientNetV2B0, EfficientNetV2B2, DenseNet169, DenseNet201, InceptionV3).



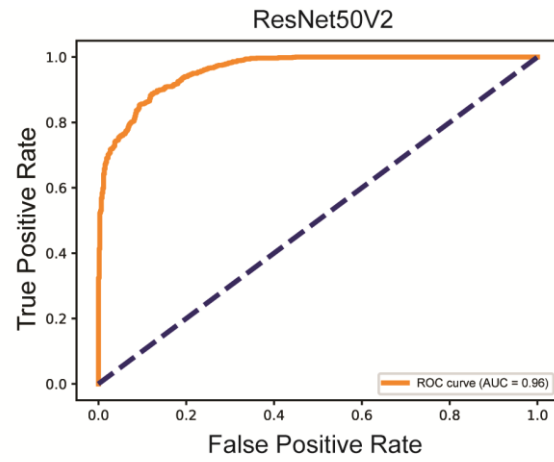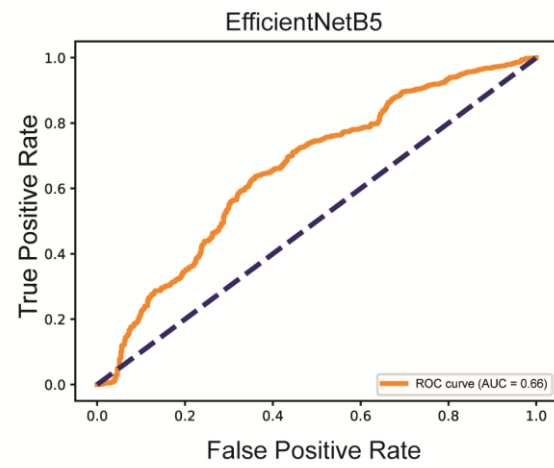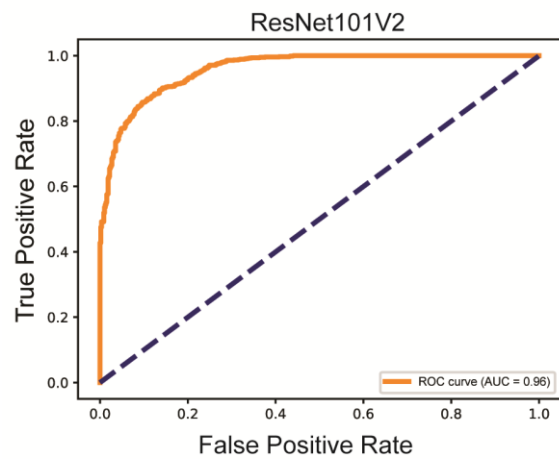

**Supplementary Figure 7.** ROC analysis of deep learning algorithms (ResNet50V2, EfficientNetB5, Resnet101V2).

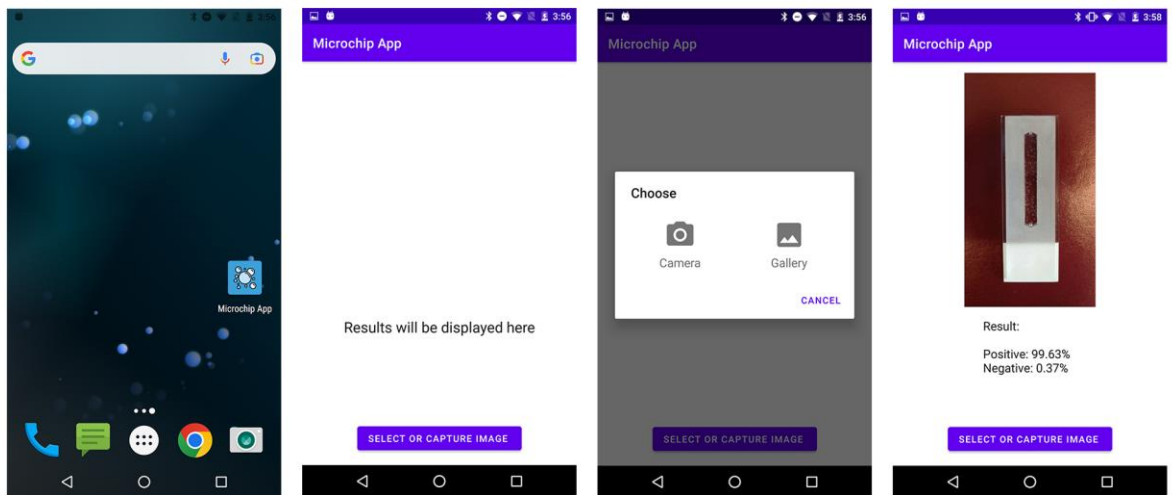

**Supplementary Figure 8.** The mobile application developed with DenseNet169 algorithm, facilitating the testing and classification of microfluidic chips. Users are presented with two distinct options for chip classification: the first option is selecting an image stored on phone, and the second option is starting the cellphone camera and testing sample.

## b. Supplementary Tables

**Supplementary Table 1.** ML algorithms performance in microfluidic testing.

| <b>Models</b>          | <b>Accuracy</b> | <b>Precision</b> | <b>Sensitivity</b> | <b>F1 Score</b> | <b>Specificity</b> | <b>MCC</b> | <b>AUC</b> |
|------------------------|-----------------|------------------|--------------------|-----------------|--------------------|------------|------------|
| Naive Bayes            | 0.6878          | 0.7768           | 0.7072             | 0.7404          | 0.6548             | 0.3534     | 0.68       |
| Logistic Regression    | 0.7969          | 0.7838           | 0.9353             | 0.8529          | 0.5618             | 0.5551     | 0.78       |
| Decision Tree          | 0.8332          | 0.875            | 0.8576             | 0.8662          | 0.7919             | 0.6452     | 0.82       |
| K-Nearest Neighbors    | 0.8389          | 0.9298           | 0.8048             | 0.8628          | 0.8968             | 0.6804     | 0.9        |
| Support Vector Machine | 0.8295          | 0.8533           | 0.8805             | 0.8667          | 0.7428             | 0.6309     | 0.87       |
| Random Forest          | 0.9072          | 0.903            | 0.9552             | 0.928           | 0.8257             | 0.7995     | 0.97       |

**Supplementary Table 2.** DL algorithms performance in microfluidic testing.

| <b>Models</b>   | <b>Accuracy</b> | <b>Precision</b> | <b>Sensitivity</b> | <b>F1 Score</b> | <b>Specificity</b> | <b>MCC</b> | <b>AUC</b> |
|-----------------|-----------------|------------------|--------------------|-----------------|--------------------|------------|------------|
| MobileNetV2     | 0.7837          | 0.8766           | 0.7639             | 0.8164          | 0.8173             | 0.5641     | 0.88       |
| EfficienNetV2B0 | 0.7248          | 0.7205           | 0.9193             | 0.8079          | 0.3942             | 0.3809     | 0.71       |
| EfficienNetV2B2 | 0.6144          | 0.7569           | 0.5707             | 0.6508          | 0.6887             | 0.2509     | 0.72       |
| DenseNet169     | 0.9248          | 0.9529           | 0.9263             | 0.9394          | 0.9222             | 0.8409     | 0.92       |
| DenseNet201     | 0.8495          | 0.9116           | 0.8426             | 0.8758          | 0.8613             | 0.6892     | 0.9        |
| InceptionV3     | 0.8972          | 0.9303           | 0.9044             | 0.9172          | 0.8849             | 0.7822     | 0.95       |
| ResNet50V2      | 0.8633          | 0.93             | 0.8466             | 0.8863          | 0.8917             | 0.7209     | 0.96       |
| EfficientNetB5  | 0.79            | 0.7665           | 0.9582             | 0.8517          | 0.5042             | 0.5453     | 0.66       |
| ResNet101V2     | 0.8777          | 0.9192           | 0.8835             | 0.901           | 0.868              | 0.7424     | 0.96       |

**Supplementary Table 3.** Performance of ML compared to DL in microfluidic testing under challenging conditions that simulate real-world sample testing.

| <b>Models</b>        | <b>Accuracy</b> | <b>Precision</b> | <b>Sensitivity</b> | <b>F1 Score</b> | <b>Specificity</b> | <b>MCC</b> | <b>AUC</b> |
|----------------------|-----------------|------------------|--------------------|-----------------|--------------------|------------|------------|
| <b>DenseNet169</b>   | 0.882           | 0.9181           | 0.8419             | 0.8784          | 0.9231             | 0.7669     | 0.92       |
| <b>Random Forest</b> | 0.804           | 0.7798           | 0.8538             | 0.8151          | 0.7530             | 0.6103     | 0.87       |

**Supplementary Table 4.** AI performance in testing microfluidics at POC.

| <b>Models</b> | <b>Accuracy</b> | <b>Precision</b> | <b>Sensitivity</b> | <b>F1 Score</b> | <b>Specificity</b> | <b>MCC</b> | <b>AUC</b> |
|---------------|-----------------|------------------|--------------------|-----------------|--------------------|------------|------------|
| <b>App</b>    | 0.848           | 0.9323           | 0.8105             | 0.8671          | 0.9072             | 0.7009     | 0.90       |
